# Supplementary material for: Vortioxetine improves cognition in mild cognitive impairment
Source: PubMed Central journal article supplement — Int Clin Psychopharmacol. 2021 Jul 16;36(6):279–87. doi: 10.1097/YIC.0000000000000376 (PMC8483775; doi:10.1097/yic.0000000000000376), 2021-07-16
Supplement: icp-36-279-s001.pdf [file icp-36-279-s001.pdf]

1 **Supplemental Digital Content**

2 **Table 1. Subject discontinuations and analysis populations**

| <b>All subjects (N=111)</b>            | <b>Month 1</b> | <b>Month 3</b> | <b>Month 6</b> |
|----------------------------------------|----------------|----------------|----------------|
| ITT population (N=83)                  | 83             | 71             | 66             |
| PP population (N=55)                   | 55             | 55             | 55             |
| Subjects discontinued, n (%)           | 28 (25.2)      | 40 (36.0)      | 45 (40.5)      |
| Subjects remaining in the study, n (%) | 83 (74.8)      | 71 (64.0)      | 66 (59.5)      |

3 *The ITT analysis set consisted of subjects who received at least one dose of vortioxetine, and had pre-*  
 4 *intervention and at least one post-intervention assessment of efficacy.*

5 *The PP analysis set was a subset of the ITT analysis set, and consisted of subjects who completed all*  
 6 *scheduled visits without major protocol deviations or violations.*

7 *Percentages are based on the total number of enrolled subjects (N=111).*

8 **Supplemental Digital Content**9 **Table 2. Adverse drug reactions**

| <b>Summary of ADRs</b>                |                          | <b>N = 111</b>       |
|---------------------------------------|--------------------------|----------------------|
| <b>System Organ Class</b>             | <b>n (%) of subjects</b> | <b>No. of events</b> |
| <b>Preferred Term</b>                 |                          |                      |
| <b>Any ADRs</b>                       | <b>3 (2.7)</b>           | <b>4</b>             |
| Serious ADRs                          |                          |                      |
| Not serious                           |                          | 4                    |
| Severity                              |                          |                      |
| Mild                                  |                          | 4                    |
| Changes to study product due to event |                          |                      |
| Dose not changed                      |                          | 4                    |
| <b>ADRs (diagnosis)</b>               |                          |                      |
| Nausea                                | 2 (1.8)                  | 2                    |
| Gastritis                             | 1 (0.9)                  | 1                    |
| Headache                              | 1 (0.9)                  | 1                    |

10 *ADRs were any AEs that were assessed by the investigators to be possibly, probably or definitely related*

11 *to the study treatment*
